# Supplementary material for: Glutathione and Its Biosynthetic Intermediates Alleviate Cesium Stress in Arabidopsis
Source: PubMed Central journal article supplement (PMC6985154; doi:10.3389/fpls.2019.01711), 2020-01-21
Supplement: DataSheet_1.pdf [file DataSheet_1.pdf]

**Supplementary Table S1.** Sequences of qRT-PCR primers used in this study

| name              | sequence                              |
|-------------------|---------------------------------------|
| <i>SULTR1;3-f</i> | CCCTAAGTATGGTCTATATTCAAGTTTTGTCCTC    |
| <i>SULTR1;3-r</i> | GATCTCAGCACGAAGCAGAGTACCTAATAG        |
| <i>SULTR2;1-f</i> | ATGACGGTTAAGACTCCCGGA                 |
| <i>SULTR2;1-r</i> | CGACCCATCCCATAATCCTTT                 |
| <i>SULTR2;2-f</i> | CGACATGTCTTGCGTGATGGGCG               |
| <i>SULTR2;2-r</i> | GCTCGCTTCAATTTGTGAAGTACCCT            |
| <i>SULTR4;1-f</i> | TGACACCTCCAATGAAGCTCGTCCTC            |
| <i>SULTR4;1-r</i> | AATTGGTGGAAGGCCAGCTAGTTTCG            |
| <i>SULTR4;2-f</i> | GATTCCACCTCTTCTGATCCTCACT             |
| <i>SULTR4;2-r</i> | TATTGGTTGAAGCCCAGCTAACCTT             |
| <i>SERAT2;1-f</i> | GCTCATACCCTCTGGAAACAGAACAGAAAAATC     |
| <i>SERAT2;1-r</i> | GCCCGTCGCATGGTCTAAAAGAATC             |
| <i>OASTLa-f</i>   | CTGTATGGAGTGGAGCCAGTTGAAAGTG          |
| <i>OASTLa-r</i>   | GATTCATCACTTGAAACCTGAACAACCTTCGTCAT   |
| <i>GSH1-f</i>     | TACGCACTCGATGTCCCTATGTACTTTGCCTAC     |
| <i>GSH1-r</i>     | TCATCTCCAAGTATCTCTTCAACCGAACCTCTG     |
| <i>GSH2-f</i>     | CTCAGAGAGAAGGCGGAGGAAACAACATCTATG     |
| <i>GSH2-r</i>     | CCGAGTTCTGATATAGCTTGATGCTTATGGTAAACGC |
| <i>PCS1-f</i>     | CTTCCGCCGAAGGCAAGCTAATCTTCAATG        |
| <i>PCS1-r</i>     | AACACCACTGAGAGACTAGCCAAACCAC          |
| <i>PCS2-f</i>     | AAATGTATCAAAGGTCTTGGTGAGGAGAAAGTGAC   |
| <i>PCS2-r</i>     | GAAGCAAAGTCGGGTGGCTAACCATG            |
| <i>TUB2-f</i>     | GCCAATCCGGTGCTGGTAACA                 |
| <i>TUB2-r</i>     | CATACCAGATCCAGTTCCTCCTCCC             |

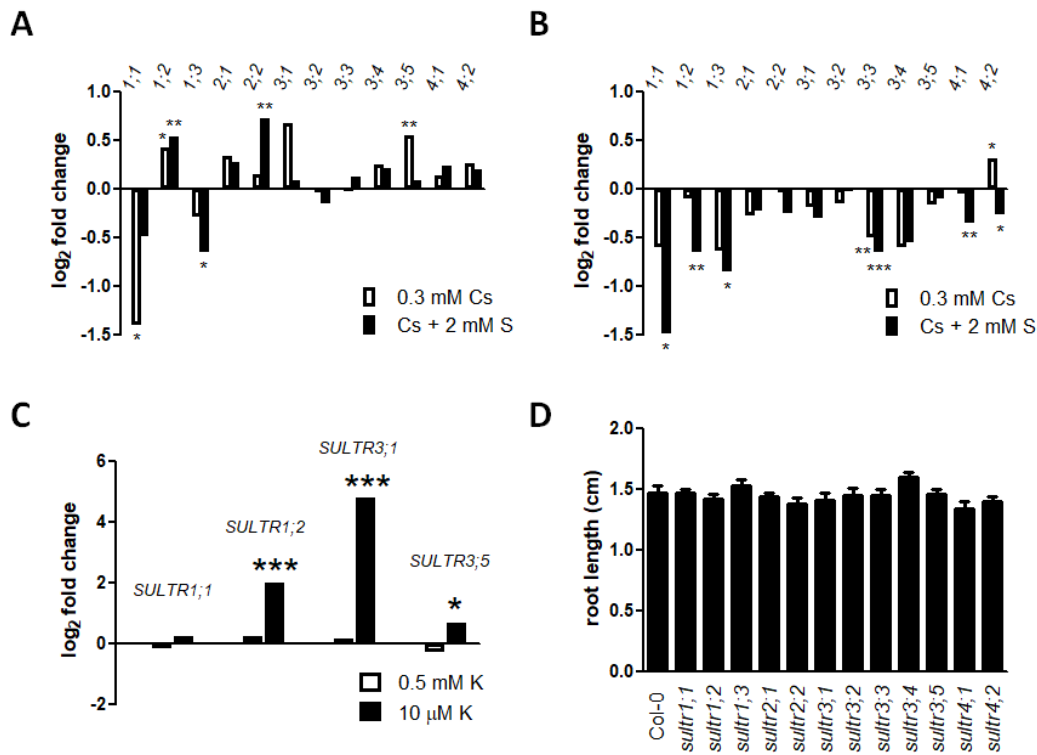

**Supplementary Fig. S1.** Gene expression of sulphate transporter genes (*SULTRs*) in response to cesium and potassium deficiency stress and phenotype of potassium-deprived *sultr* mutants. Expression of *SULTRs* in roots (A) and shoots (B) of the wild type (Col-0) grown on media containing 0.5 mM potassium (K) and 0.3 mM cesium (Cs) with or without 2 mM sulphate (S) for eight days. Values are log<sub>2</sub>ratios relative to expression in the control seedlings grown in the absence of cesium. Statistically significant differences were determined by one-way ANOVA with Bonferroni's multiple comparison posttest (n=3, \* for  $P<0.05$ , \*\* for  $P<0.01$ , \*\*\* for  $P<0.001$ ). (C) Expression of *SULTRs* in roots of Col-0 grown on media containing 10 μM or 0.5 mM K for eight days. Values are log<sub>2</sub>ratios relative to expression in the optimal potassium condition (1.75 mM). Statistically significant differences were determined by one-way ANOVA with Bonferroni's multiple comparison posttest (n=3, \* for  $P<0.05$ , \*\*\* for  $P<0.001$ ). (D) Root lengths of *sultr* mutants grown in K deficiency (10 μM) for eight days. No statistical difference relative to Col-0 was determined by one-way ANOVA with Bonferroni's multiple comparison posttest (n>19). Error bars represent the SE.

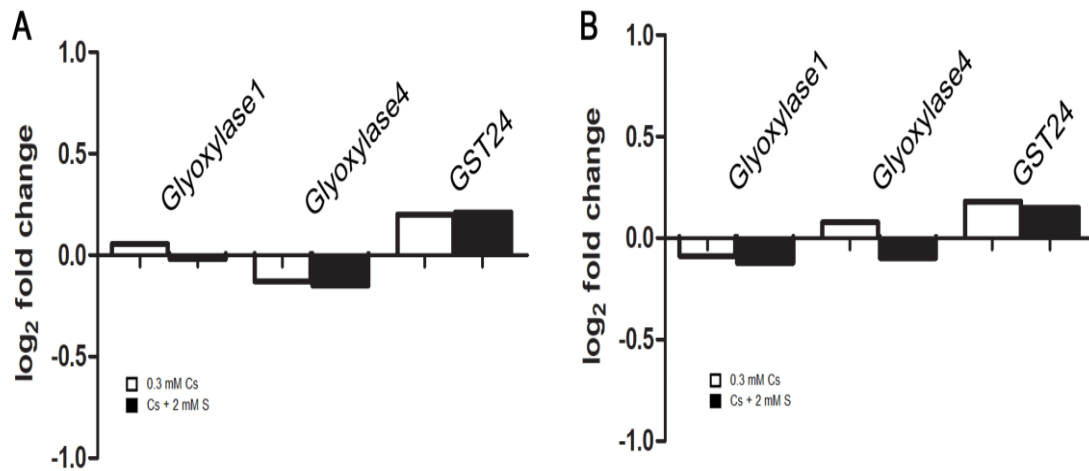

**Supplementary Fig. S2.** Expression of glyoxylase1 (At1g11840), glyoxylase4 (At1g15380), and glutathione-S-transferase24 (At1g17170) in response to cesium. Gene expression in roots (A) and shoots (B) of the wild type (Col-0) grown on media containing 1.75 mM potassium (K) and 0.3 mM cesium (Cs) with or without 2 mM sulphate (S) for eight days. Values are log<sub>2</sub> ratios relative to expression in the control seedlings grown in the absence of cesium (1.75 mM K + 0.75 mM S). No statistical difference was determined by one-way ANOVA with Bonferroni's multiple comparison posttest.

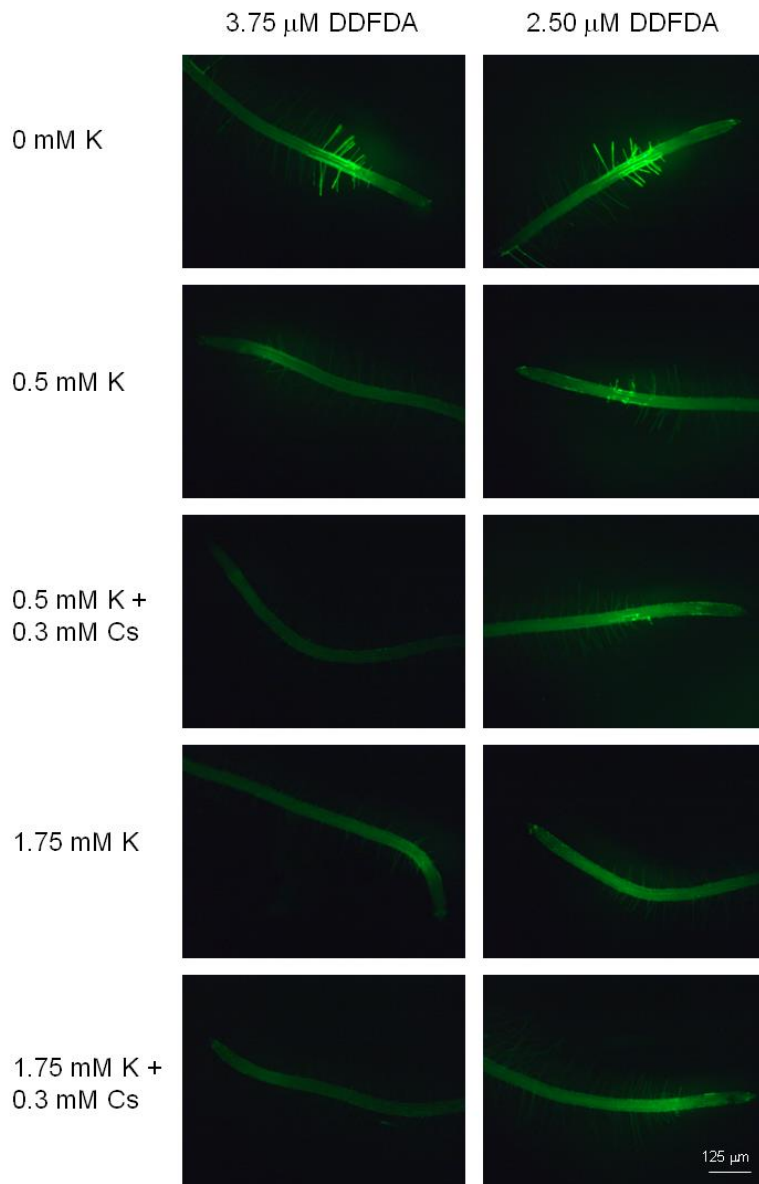

**Supplementary Fig. S3.** Subcellular images of ROS accumulation in the roots exposed to cesium and potassium deficiency stress. Three-day-old Col-0 seedlings germinated on the indicated concentrations of K and Cs were incubated for approximately 20 hours in liquid media with the same composition without sucrose, then in liquid media containing 5-(and 6-) carboxy-2',7'-difluorodihydrofluorescein diacetate(DFFDA) in the dark for 15 minutes prior to imaging. The scale bar indicates 125  $\mu$ m.  $n > 10$  seedlings.
